# Supplementary material
Source: Springer Nature journal article supplement (https://www.springermedizin.de/resource/supplementary/12891_2012_1730_MOESM3_ESM.pdf/9508416)

# Displacement after cyclic loading

■ Conv cyclic

■ Jail cyclic

Displacement in mm

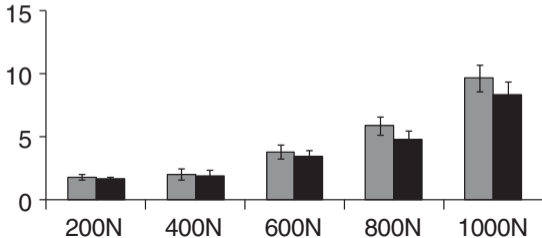

Supplement: MOESM3 [file 9508416]
